# Supplementary material for: Activation status dictates the function of unlicensed natural killer cells in mice and humans
Source: PubMed Central journal article supplement — Blood Adv. 2021 Oct 25;5(20):4219–32. doi: 10.1182/bloodadvances.2021004589 (PMC8945636; doi:10.1182/bloodadvances.2021004589), 2021-10-25
Supplement: advancesADV2021004589-suppl1.pdf [file advancesADV2021004589-suppl1.pdf]

### **Supplemental Figure 1: Dot plots of liver and lymph node NK cell subsets**

### **Supplemental Figure 2: Breakdown of NK cell subsets**

(A) Expression of Ly49G2 and Ly49A on unlicensed (Ly49C/I-) NK cells in lymph nodes (LN) on dpi 5

(B) Expression of Ly49G2 and Ly49A on unlicensed (Ly49C/I-) NK cells in liver on dpi 5

(C) Ly49H expression on licensed and unlicensed NK cells in the liver on dpi 5

### **Supplemental Figure 3: Subset depletion validation**

Populations of splenic CD3-NK1.1 NK cells expressing either Ly49I (clone YLI-90), Ly49G2 (clone Cwy3) or Ly49A (clone YE1/48.10.6) following in vivo depletion with anti-Ly49C/I (clone 5E6; licensed), anti-Ly49G2 (clone 4D11; unlicensed) or anti-Ly49A (clone YE1/32; unlicensed). Depletion was verified 7 days following administration of antibody and compared with isotype control treated animals.

### **Supplemental Figure 4: Linear regression of MCMV-specific tetramer+ T cells and viral titers**

(A) Low dose infection tetramer+ T cell numbers and viral titers

(B) High dose infection tetramer+ T cell numbers and viral titers

### **Supplemental Figure 5: The effect of NK cell subset depletion on MCMV-specific tetramer+ T cells across organs**

(A) Spleen on day 7 post-infection

(B) Lymph nodes (LN) on day 7 post-infection

### **Supplemental Figure 6: Frequency of Ly49H on licensed and unlicensed NK cells on day 7 post-infection in control and HSCT mice**

## Liver

## Lymph Nodes

Uninfected

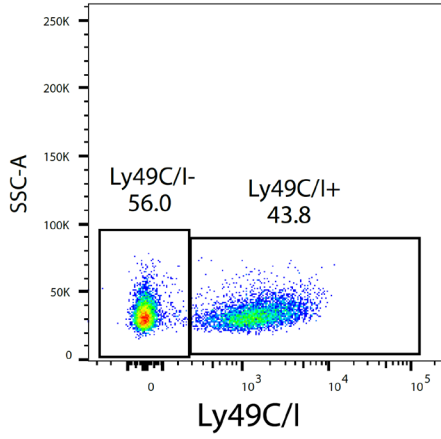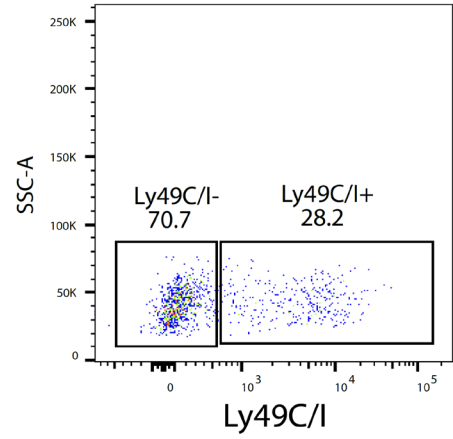

Low Dose

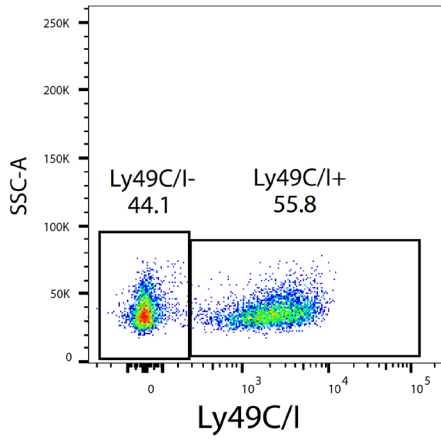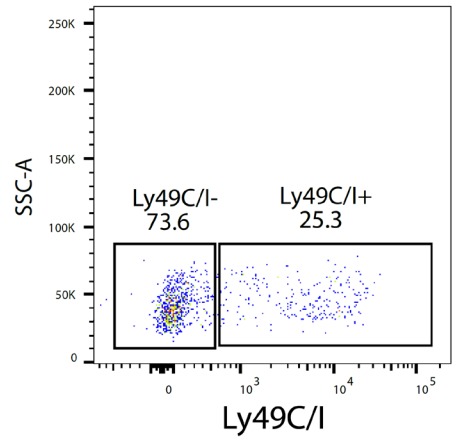

High Dose

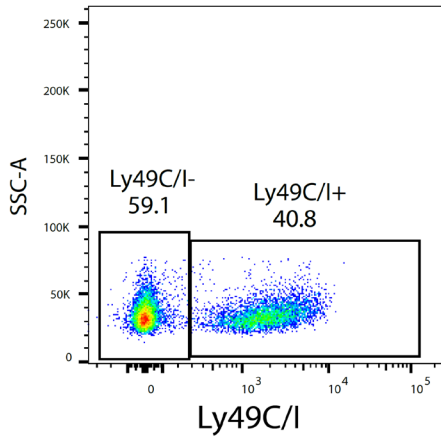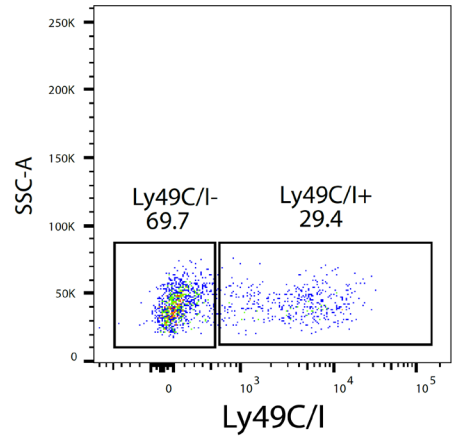

**A**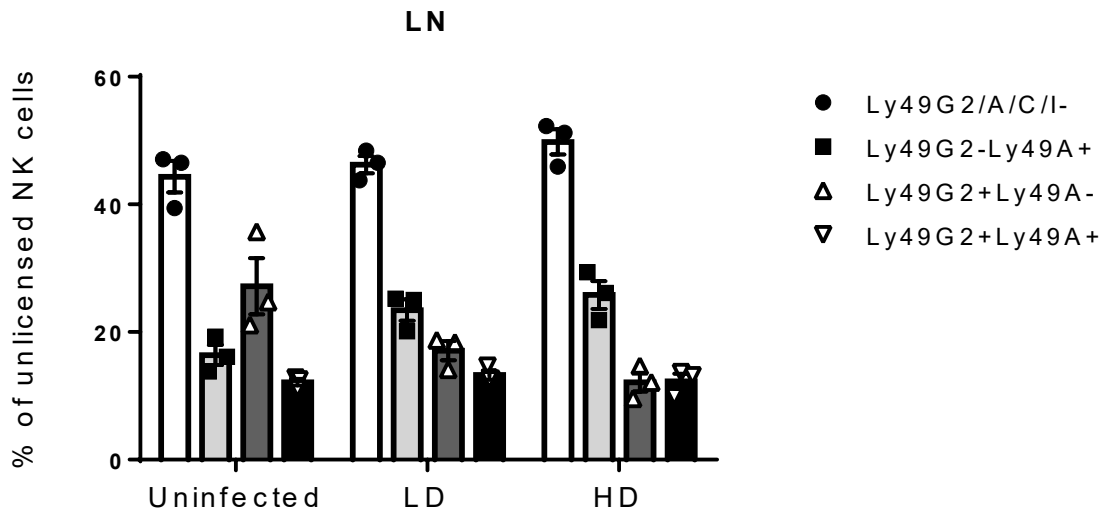**B**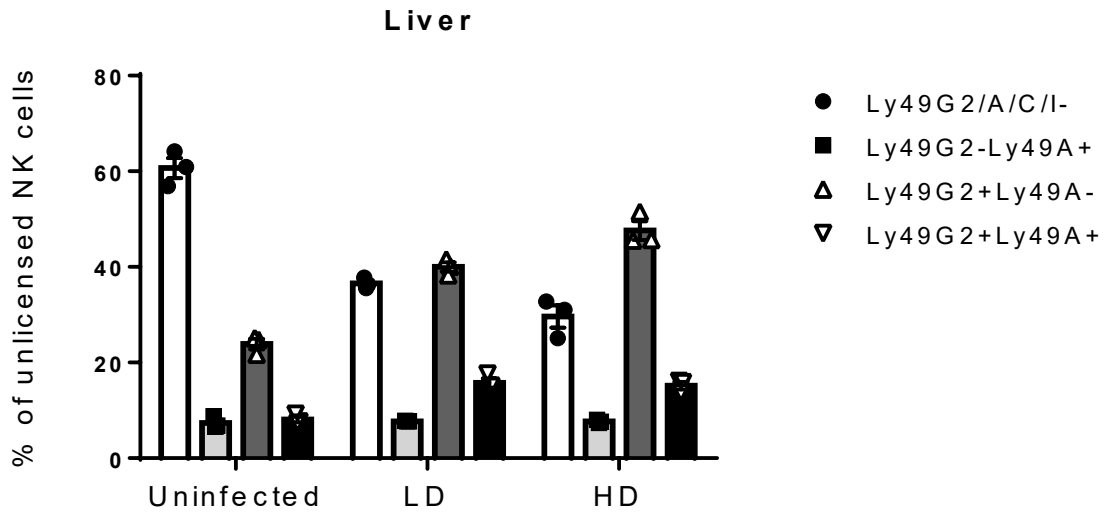**C**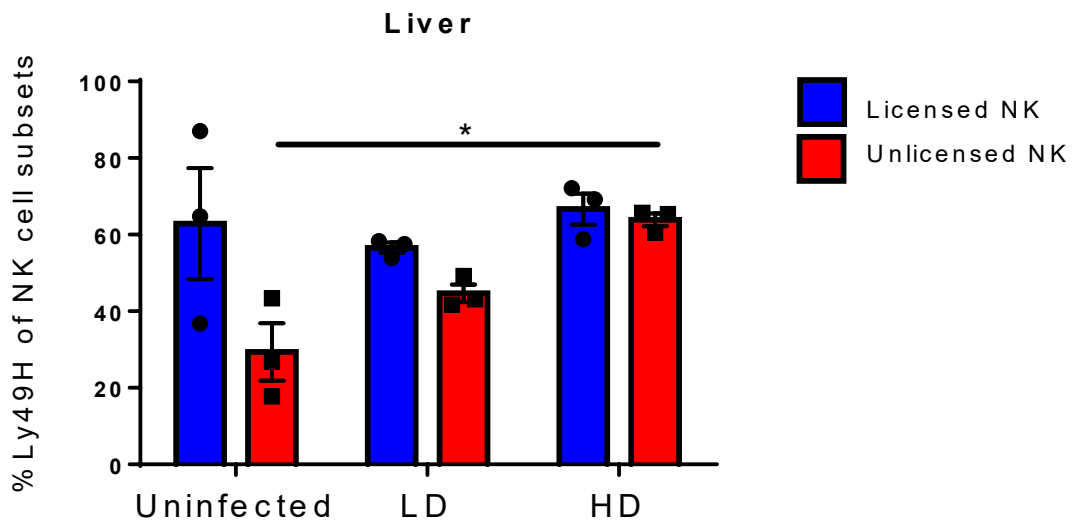

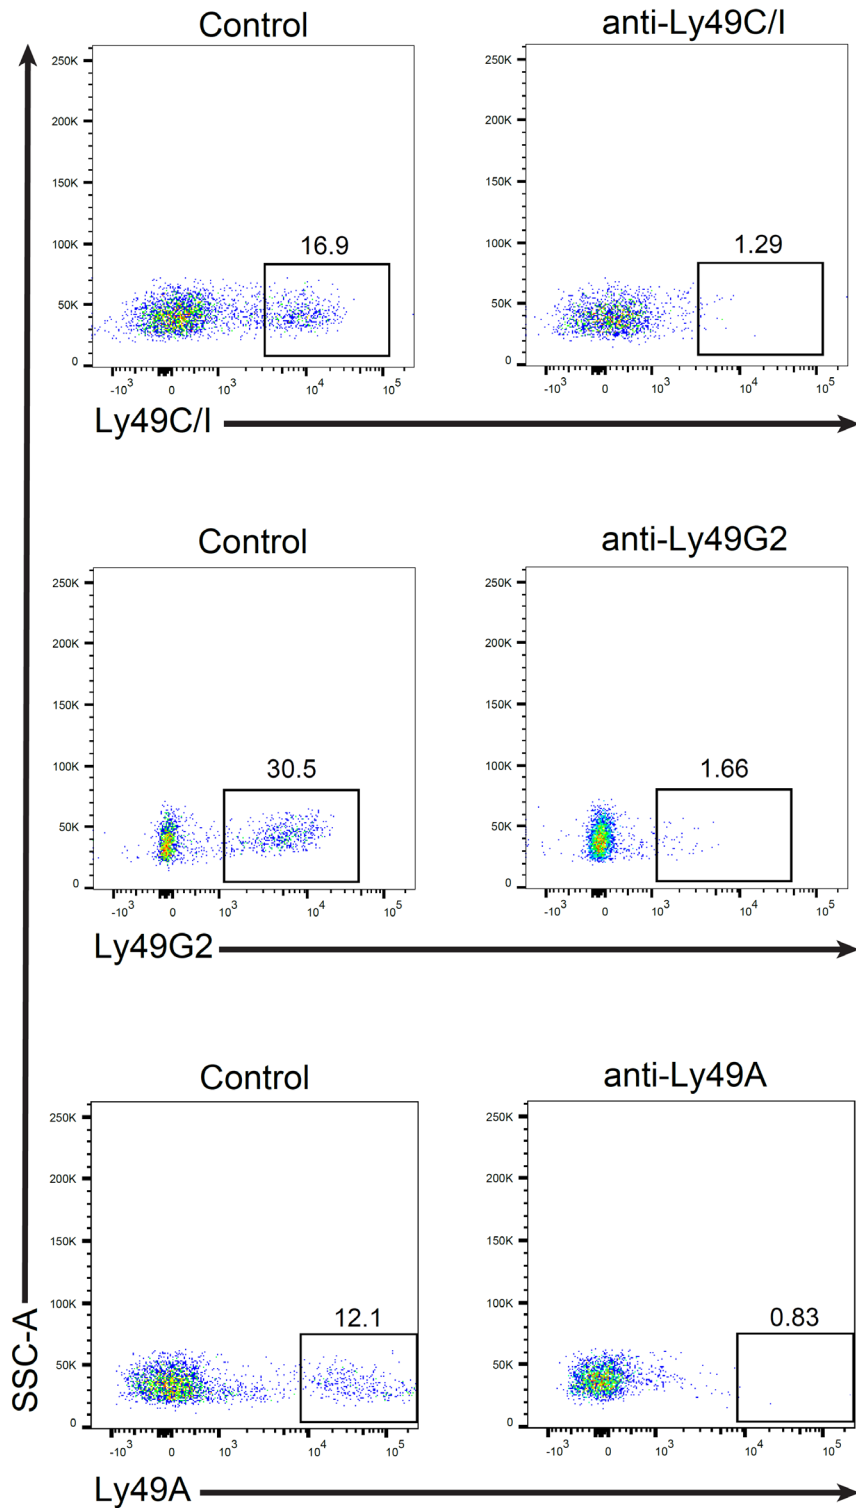

Supplemental Figure 3

**A**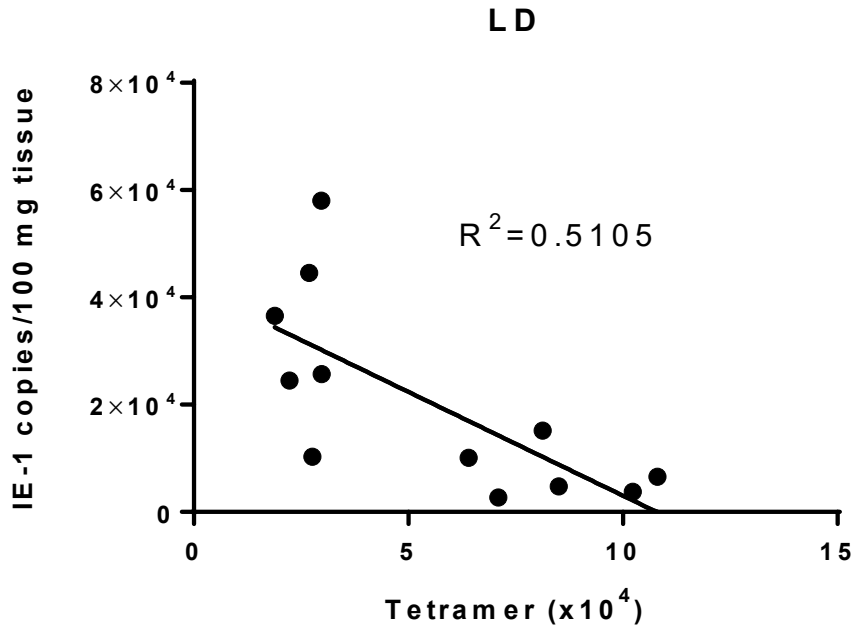**B**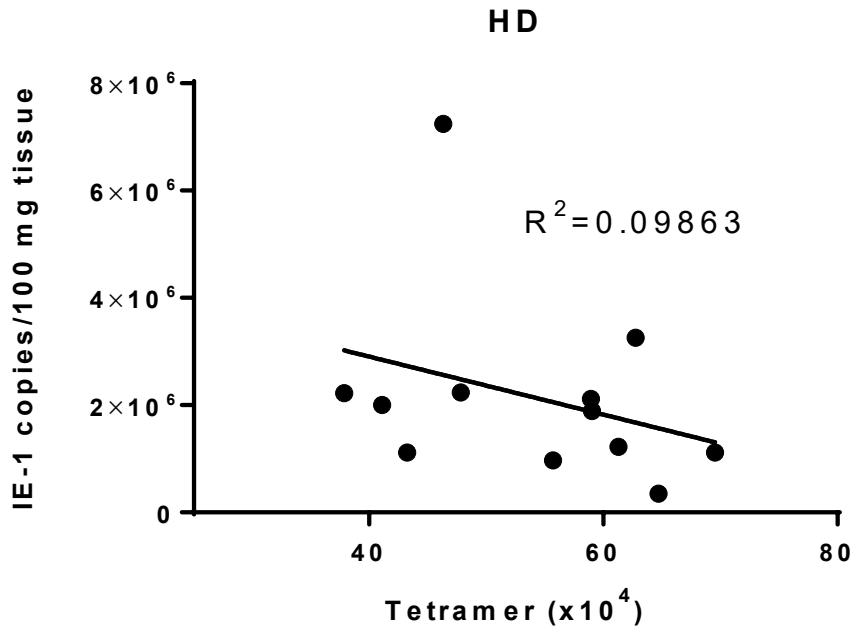

**A**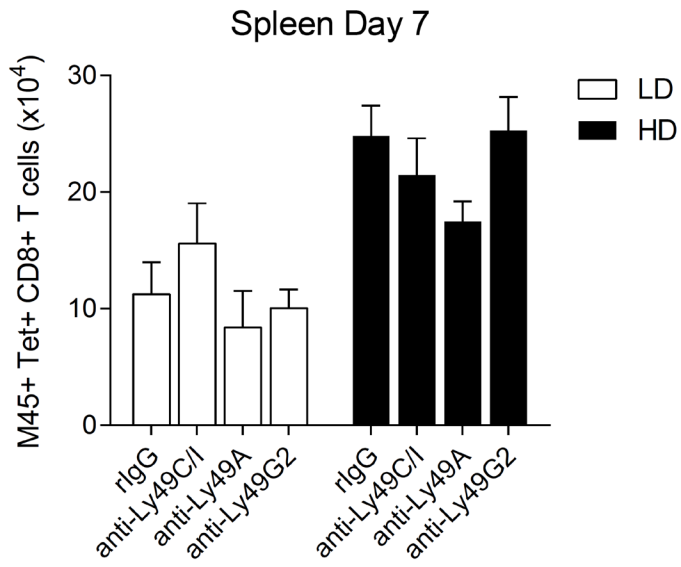**B**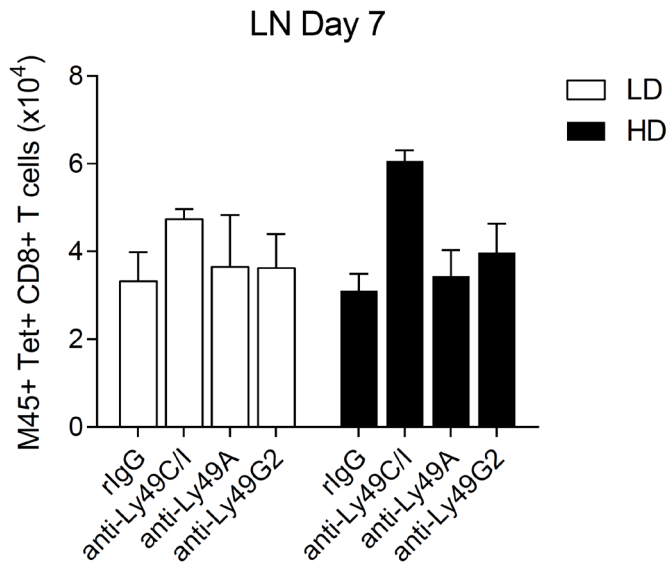

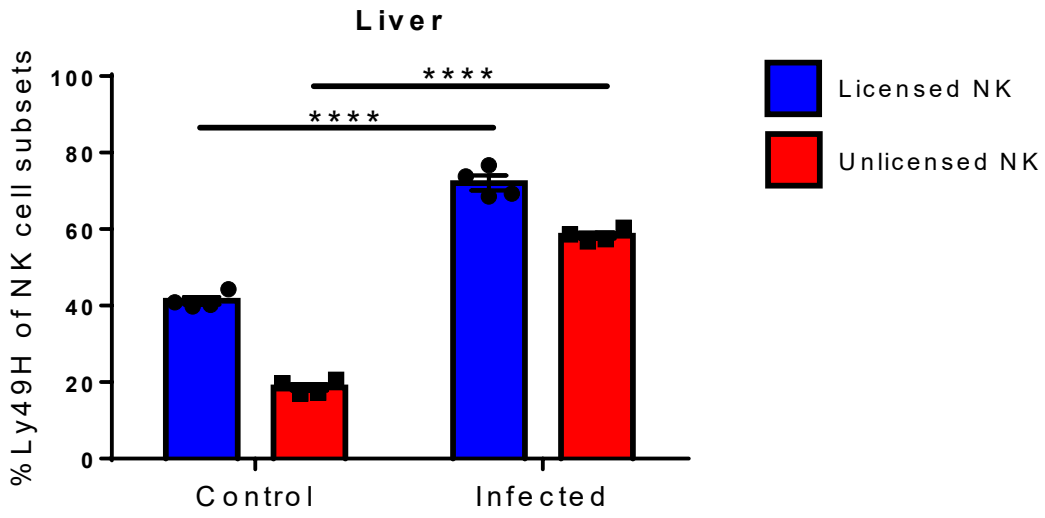

**Supplemental Figure 6**
